# Supplementary material
Source: publisher site journal article supplement (https://www.spandidos-publications.com/4740/downloadSupplementary)

Figure S1. Effect of R1D2-10 on relative telomerase activity by real-time quantitative telomerase repeat amplification protocol. Quantification of relative telomerase activity was performed by real-time PCR with specific primers using template protein extract from treated and untreated cells for 48 h. Data were analyzed by one-way ANOVA followed by Dunnett's test and are presented as the mean  $\pm$  SEM (n=3). \*P<0.05, \*\*P<0.01, \*\*\*P<0.001.

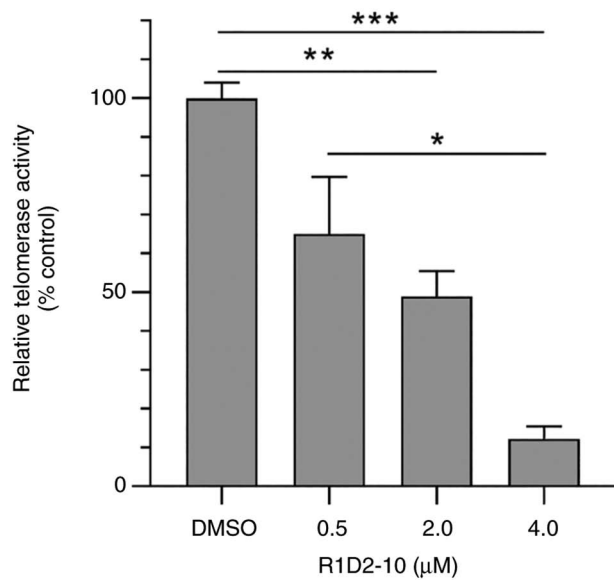

Figure S2. *In vitro* R1D2-10 cell viability evaluation. Cytotoxic effect of R1D2-10 was evaluated in normal primary cell culture of mice brain. Viable cells were determined by trypan blue staining and counting (4 wells/condition). Data were analyzed by one-way ANOVA followed by Dunnett's test and are presented as the mean  $\pm$  SEM (n=3). \*\*\*P<0.001 vs. control (DMSO).

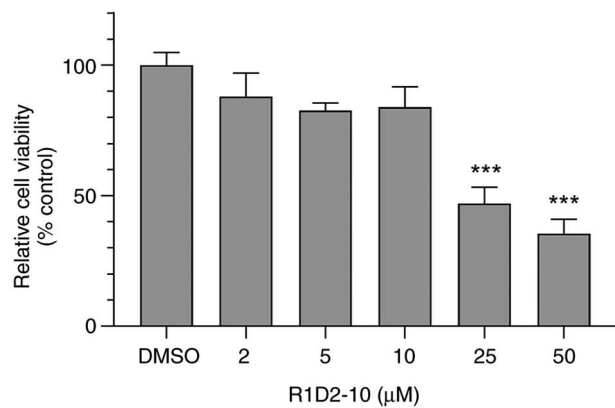

Supplement: Supplementary file 1 [file downloadSupplementary]
